# Supplementary material for: Knowledge and correlates of use of safer conception methods among HIV-infected women attending HIV care in Uganda
Source: Springer Nature journal article supplement (doi:10.1186/s12978-019-0717-6), 2019-05-01
Supplement: MOESM2 [file 16759052]

## Correlação do conhecimento e do uso de métodos de concepção mais seguros entre mulheres seropositivas (VIH) a receber cuidados de saúde para o VIH no Uganda

Violet Gwokyalya<sup>1\*</sup>, Jolly Beyeza-Kashesya<sup>2</sup>, John Baptist Bwanika<sup>1</sup>, Joseph KB Matovu<sup>1</sup>, Shaban Mugerwa<sup>3</sup>, Jim Arinaitwe<sup>3</sup>, Dickson Kasozi<sup>1</sup>, Justine Bukenya<sup>1</sup>, Rosemary Kindyomunda<sup>4</sup>, Glenn J. Wagner<sup>5</sup>, Fredrick E Makumbi<sup>1</sup> and Rhoda K. Wanyenze<sup>1</sup>

**Afilições:** <sup>1</sup>Makerere University School of Public Health, Kampala, Uganda, <sup>2</sup>Department of Obstetrics and Gynecology, Mulago National Referral Hospital, Kampala, Uganda, <sup>3</sup>Ministry of Health, Kampala, Uganda, <sup>4</sup>UNFPA, Kampala, Uganda, <sup>5</sup>RAND Corporation, Santa Monica, CA, USA.

### \*Autor correspondente:

Violet Gwokyalya: vgwokyalya@musph.ac.ug

### Endereço de e-mail do autor:

Jolly Beyeza-Kashesya: jbeyeza@gmail.com  
John Baptist Bwanika: bwaniakjb@yahoo.com  
Joseph KB Matovu: jmatovu@musph.ac.ug  
Shaban Mugerwa: shabanmugerwa@gmail.com  
Jim Arinaitwe: jim\_ari@yahoo.co.uk  
Dickson Kasozi: dikasozi@gmail.com  
Rosemary Kindyomunda: kindyomunda@unfpa.org  
Justine Bukenya: jbukenya@musph.ac.ug  
Glenn J. Wagner: gwagner@rand.org  
Fredrick E Makumbi: fmakumbi@musph.ac.ug  
Rhoda K. Wanyenze: rwanyenze@musph.ac.ug

## Resumo

**Introdução:** Muitas pessoas portadoras de VIH gostariam de ter filhos, mas os serviços de planeamento familiar (PF) centram-se frequentemente na contraceção. A disponibilidade de serviços de concepção mais seguros ainda é muito baixa na maioria dos países de baixo rendimento. Neste estudo, foi avaliado o conhecimento e uso de métodos de concepção mais seguros entre as mulheres infetadas com VIH a receber cuidados de saúde para o VIH no Uganda, para informar sobre a integração de métodos de concepção mais seguros nos serviços de PF existentes.

**Métodos:** Os dados foram recolhidos a partir de um inquérito transversal de representatividade nacional com 5198 mulheres entre 15 e 49 anos infetadas com o VIH em 245 clínicas de VIH no Uganda. O conhecimento e uso de métodos de conceção mais seguros, incluindo outros fatores associados, também foram determinados. A medida de associação utilizada foi a taxa de prevalência (TP) com base em intervalos de confiança a 95%, obtidos por meio da regressão de Poisson modificada através de modelos lineares generalizados. Todas as análises foram realizadas com o software STATA (versão 12.0).

**Resultados:** O conhecimento global sobre qualquer método de conceção mais seguro foi de 74,1% (3852/5198). Contudo, apenas 13,2% tinha conhecimento de três dos quatro métodos, 18,9% tinha conhecimento de apenas dois métodos e 42% apenas tinha conhecimento de um método. O conhecimento de métodos de conceção mais seguros específicos foi superior para um período de tempo de relações sexuais sem proteção com 39% (n=2027), seguido de autoinseminação manual com 34,8% (n=1809) e profilaxia de pré-exposição com 24,8% (n=1289). O conhecimento de métodos de conceção mais seguros foi superior na região leste (84,8%,  $p<0,001$ ), entre mulheres em relações serodiscordantes para VIH (76,7%,  $p<0,017$ ) e aquelas a receber TAR (74,5%,  $p<0,034$ ). No geral, 1796 mulheres (34,6%) estavam grávidas ou registaram um nascimento nos últimos dois anos, o que significa que a utilização global de métodos de conceção mais seguros neste grupo foi de 11,6% (209/1796). A probabilidade de uso de métodos de conceção mais seguros foi substancialmente inferior em Campala [TP ajustada= 0,489 (0,314; 0,764)] ou na região leste [TP ajustada=0,244 (0,147; 0,405)], em comparação com a região norte. A maior probabilidade do uso de métodos de conceção mais

seguros foi associada à divulgação do estatuto de portador de VIH ao parceiro [TP ajustada= 2,613 (1,308; 5,221)] e a relações serodiscordantes em comparação com relações seroconcordantes para VIH [TP ajustada=1,637(1,236; 2,168)]. O conhecimento pré-existente dos métodos de concepção mais seguros não influenciou a utilização dos mesmos.

**Conclusões:** O conhecimento e uso de métodos de concepção mais seguros entre as mulheres seropositivas a receber cuidados de saúde é reduzido. Os esforços para melhorar a divulgação do estatuto de portador de VIH e a integração de métodos de concepção mais seguros nos serviços de PF e VIH e os esforços regionais para promover a sensibilização e o acesso a métodos de concepção mais seguros podem contribuir para aumentar a adoção de métodos de concepção mais seguros.

**Palavras-chave:** Métodos de concepção mais seguros, Conhecimento, VIH, Uganda, Saúde reprodutiva

### **Sobre este suplemento**

Este resumo foi publicado como parte da revista científica *Reproductive Health*, Volume 16, Suplemento 1, 2019: Integração Eficaz dos Serviços de Saúde Sexual e Reprodutiva e de Prevenção, Cuidados e Tratamento do VIH na África Subariana: Onde estão as provas da implementação do programa?

O suplemento foi publicado como uma colaboração entre as revistas científicas *Reproductive Health* e *BMC Public Health*. O conteúdo integral, incluindo as versões em francês, português e inglês, estão disponíveis online:

<https://bmcpublihealth.biomedcentral.com/articles/supplements/volume-19-supplement-1>

e

<https://reproductive-health-journal.biomedcentral.com/articles/supplements/volume-16-supplement-1>
